# Supplementary material for: Psychiatric Comorbidity in Children and Adults with Gluten-Related Disorders: A Narrative Review
Source: MDPI journal article supplement (doi:10.3390/nu10070875), 2018-07-06
Supplement: s1 [file s1]

**Supplementary Table 1.** Database specific search strategies

**Supplementary Table 1.1. Medline**

|                                                       |                                             |                                                                                                                                                                                                                                                                            |
|-------------------------------------------------------|---------------------------------------------|----------------------------------------------------------------------------------------------------------------------------------------------------------------------------------------------------------------------------------------------------------------------------|
| <b>Mental disorders term</b>                          | MeSH headings                               | mental disorders                                                                                                                                                                                                                                                           |
| <b>AND</b>                                            |                                             |                                                                                                                                                                                                                                                                            |
| <b>Celiac disease or gluten related disorder term</b> | Keywords searched for in abstract and title | gluten OR non-celiac gluten sensitivity OR gluten intolerance OR celiac disease OR celiac sprue OR gluten enteropathy OR nontropical sprue OR wheat hypersensitivity OR gluten ataxia OR dermatitis herpetiformis OR wheat allergy OR wheat intolerance OR coeliac disease |

**Supplementary Table 1.2. EMBASE**

|                                                       |                                             |                                                                                                                                                                                                                                                                            |
|-------------------------------------------------------|---------------------------------------------|----------------------------------------------------------------------------------------------------------------------------------------------------------------------------------------------------------------------------------------------------------------------------|
| <b>Mental disorders term</b>                          | Emtree subject headings                     | mental disease                                                                                                                                                                                                                                                             |
| <b>AND</b>                                            |                                             |                                                                                                                                                                                                                                                                            |
| <b>Celiac disease or gluten related disorder term</b> | Keywords searched for in abstract and title | gluten OR non-celiac gluten sensitivity OR gluten intolerance OR celiac disease OR celiac sprue OR gluten enteropathy OR nontropical sprue OR wheat hypersensitivity OR gluten ataxia OR dermatitis herpetiformis OR wheat allergy OR wheat intolerance OR coeliac disease |

**Supplementary Table 1.3. PsycINFO**

|                                                       |                                             |                                                                                                                                                                                                                                                                            |
|-------------------------------------------------------|---------------------------------------------|----------------------------------------------------------------------------------------------------------------------------------------------------------------------------------------------------------------------------------------------------------------------------|
| <b>Mental disorders term</b>                          | APA Thesaurus                               | mental disorders                                                                                                                                                                                                                                                           |
| <b>AND</b>                                            |                                             |                                                                                                                                                                                                                                                                            |
| <b>Celiac disease or gluten related disorder term</b> | Keywords searched for in abstract and title | gluten OR non-celiac gluten sensitivity OR gluten intolerance OR celiac disease OR celiac sprue OR gluten enteropathy OR Nontropical sprue OR wheat hypersensitivity OR gluten ataxia OR dermatitis herpetiformis OR wheat allergy OR wheat intolerance OR coeliac disease |
